# Supplementary material for: Iodine Status and Thyroid Function in a Group of Seaweed Consumers in Norway
Source: PubMed Central journal article supplement (PMC7697291; doi:10.3390/nu12113483), 2020-11-13
Supplement: nutrients-12-03483-s001.pdf [file nutrients-12-03483-s001.pdf]

**Supplementary Materials:**

**Table S1.** Stability in UIC from the first to the second urine sample among seaweed consumers in Norway (n=44).

| <b>UIC in 1<sup>st</sup> urine sample</b> | <b>UIC in 2<sup>nd</sup> urine sample</b> |                              |                            | <b>Correlation<sup>b</sup></b> |
|-------------------------------------------|-------------------------------------------|------------------------------|----------------------------|--------------------------------|
|                                           | Increase, n (%) <sup>a</sup>              | Decrease, n (%) <sup>a</sup> | Stable, n (%) <sup>a</sup> |                                |
| < 1000 ug/L (n=22)                        | 10 (45.5)                                 | 10 (45.5)                    | 2 (9.1)                    | 0.728**                        |
| > 1000 ug/L (n=22)                        | 11 (50.0)                                 | 4 (18.2)                     | 7 (31.8)                   | 0.546*                         |
| All participants, n=44 (100 %)            | 21 (47.7)                                 | 14 (31.8)                    | 9 (20.5)                   | 0.886**                        |

Increase and decrease were defined as a change larger than  $\pm 10\%$  from 1<sup>st</sup> to 2<sup>nd</sup> urine sample.

<sup>a</sup>Percent within categories. <sup>b</sup>Spearman's rho correlation coefficient. \*Significant <0.05. \*\*Significant <0.001.

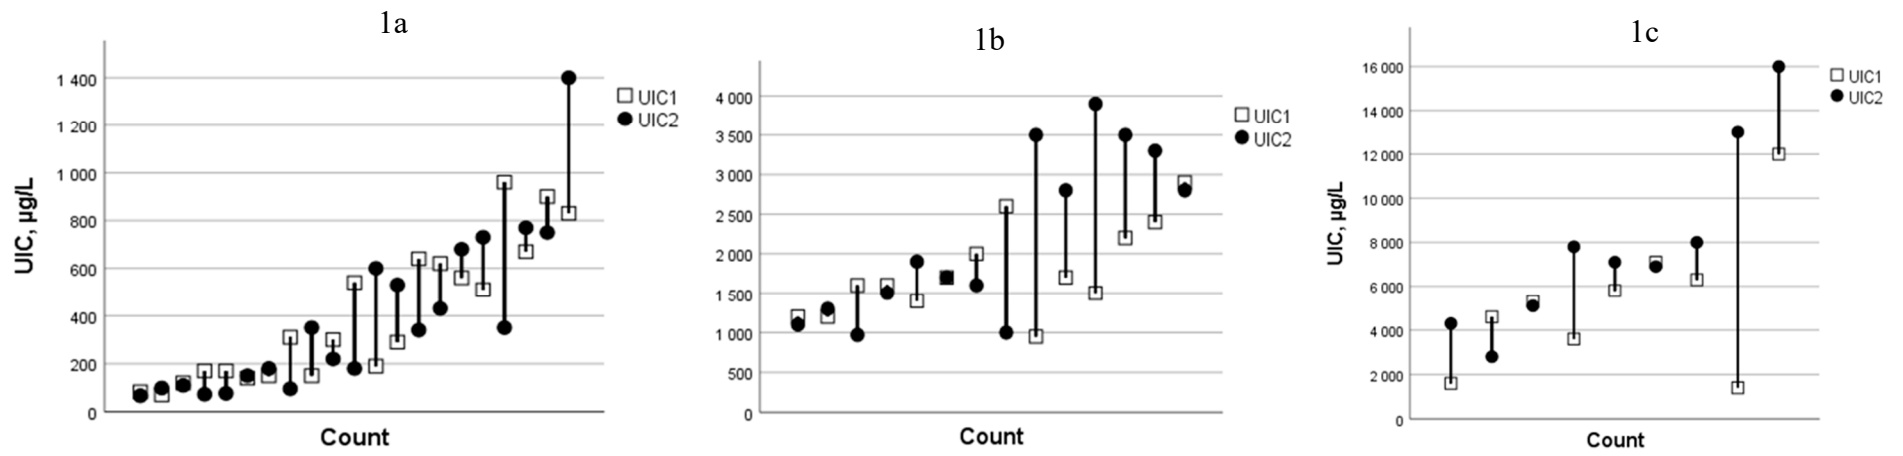

**Figure S1** (a,b,c) Drop chart of UIC between 1<sup>st</sup> urine sample and 2<sup>nd</sup> urine sample, collected after 3-4 and 7-8 hour after seaweed consumption. **Figure S1a** normal to high UIC, **Figure S1b** very high UIC and **Figure S1c** extremely high UIC.

---

**Table S2** Given reasons for including macroalgae in the diet among seaweed consumers in Norway (n=44)

| <b>Reasons for including macroalgae in the diet<sup>a</sup></b> | <b>n [%]<sup>b</sup></b> |
|-----------------------------------------------------------------|--------------------------|
| Taste                                                           | 29 [66]                  |
| Rich in nutrients                                               | 15 [34]                  |
| Sustainability                                                  | 9 [21]                   |
| Positive health effects                                         | 8 [18]                   |
| Ensure enough iodine in the diet                                | 7 [16]                   |
| Fun/ exciting                                                   | 7 [16]                   |
| Healthy                                                         | 6 [14]                   |
| A substitute for dairy or fish                                  | 4 [9]                    |
| Healing effect to cure illness                                  | 3 [7]                    |
| Reduce salt intake                                              | 3 [7]                    |

<sup>a</sup> Categorized from open ended question, multiple answers allowed, two participants did not give a reason.

<sup>b</sup> Percent of total (n=44).

**Table S3** Overview of how macroalgae are used as part of meals in the diet (n=44)

| <b>Use of macroalgae as part of the diet<sup>a</sup></b> | <b>n [%]<sup>b</sup></b> |
|----------------------------------------------------------|--------------------------|
| Unspecified                                              | 27 [61]                  |
| Seasoning/ spice                                         | 24 [55]                  |
| Sushi                                                    | 8 [18]                   |
| As a snack/ side dish                                    | 8 [18]                   |
| In bread/ baked goods                                    | 5 [11]                   |
| As powder                                                | 3 [7]                    |
| Salad                                                    | 3 [7]                    |
| Soup                                                     | 3 [7]                    |
| Tablets                                                  | 2 [5]                    |
| Pasta                                                    | 2 [5]                    |
| Crisps/ chips                                            | 2 [5]                    |
| Wok                                                      | 1 [2]                    |
| In smoothie                                              | 1 [2]                    |

<sup>a</sup> Categorized from open ended question, multiple answers allowed, two participants did not give a reason.

<sup>b</sup>Number of times mentioned. Participants could have mentioned one category of usage several times (e.g. one time for whole food and one time for foods containing macroalgae).
